# Supplementary material
Source: MDPI journal article supplement (https://www.mdpi.com/2227-9040/11/5/292)
Supplement: s1 [file s1]

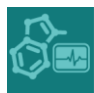

Supplementary Materials

# Screening the Specific Surface Area for Metal-Organic Frame-works by Cataluminescence

Zenghe Li <sup>1</sup>, Danning Pei <sup>1</sup>, Rui Tian <sup>1,\*</sup> and Chao Lu <sup>1,2,\*</sup>

<sup>1</sup> State Key Laboratory of Chemical Resource Engineering, Beijing University of Chemical Technology, Beijing 100029, China; lizh@mail.buct.edu.cn (Z.L.); pdanning@163.com (D.P.)

<sup>2</sup> Green Catalysis Center, College of Chemistry, Zhengzhou University, Zhengzhou 450001, China

\* Correspondence: tianrui@mail.buct.edu.cn (R.T.); luchao@mail.buct.edu.cn (C.L.)

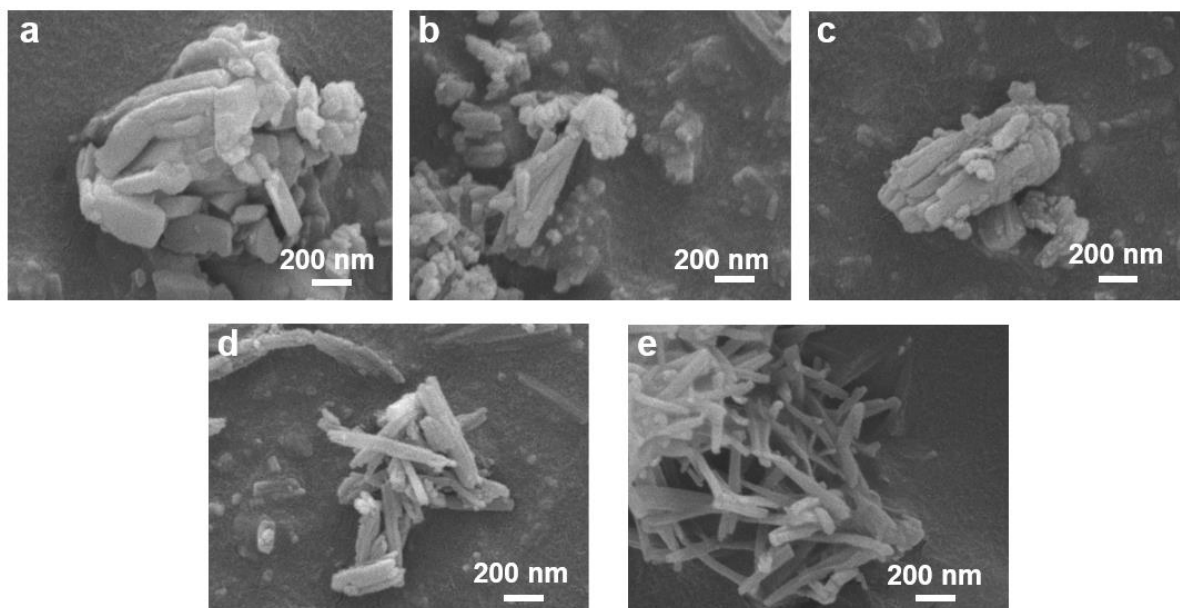

**Figure S1.** SEM images of (a) *np*, (b) *mp*-140, (c) *mp*-130, (d) *mp*-150 and (e) *lp* phases of MOFs.

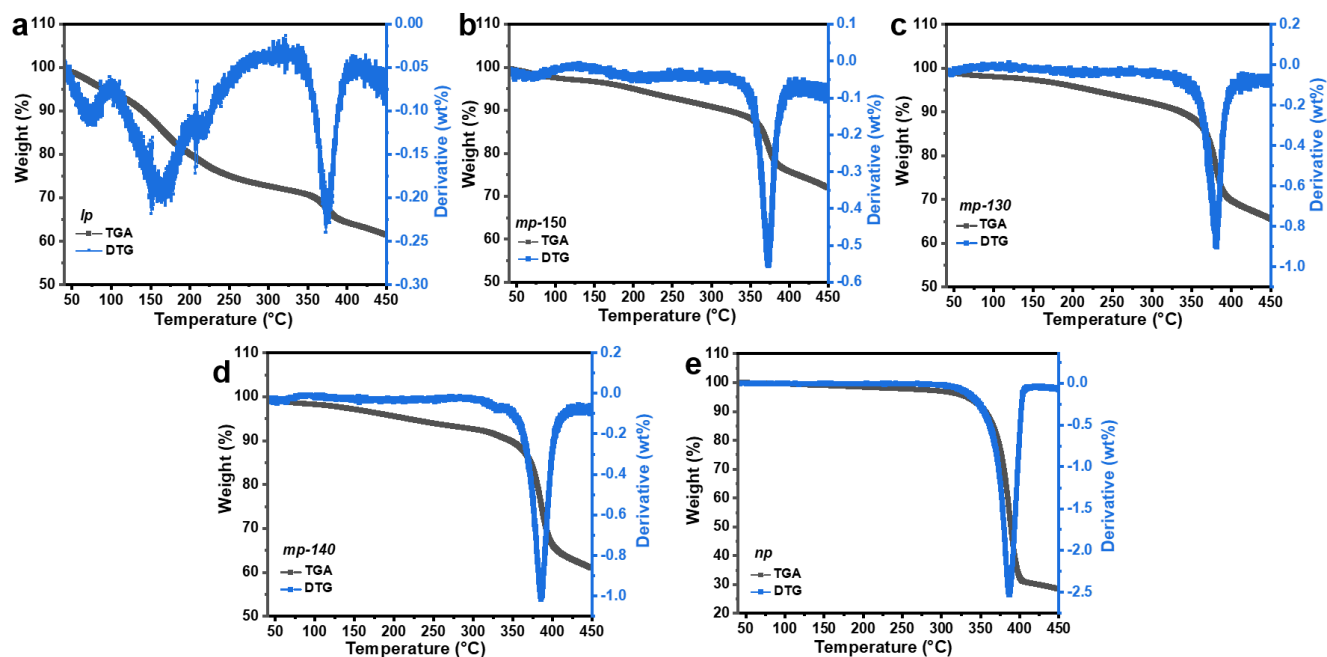

Figure S2. TGA analysis for (a) *lp*, (b) *mp-150*, (c) *mp-130*, (d) *mp-140* and (e) *np* phases of MOFs.

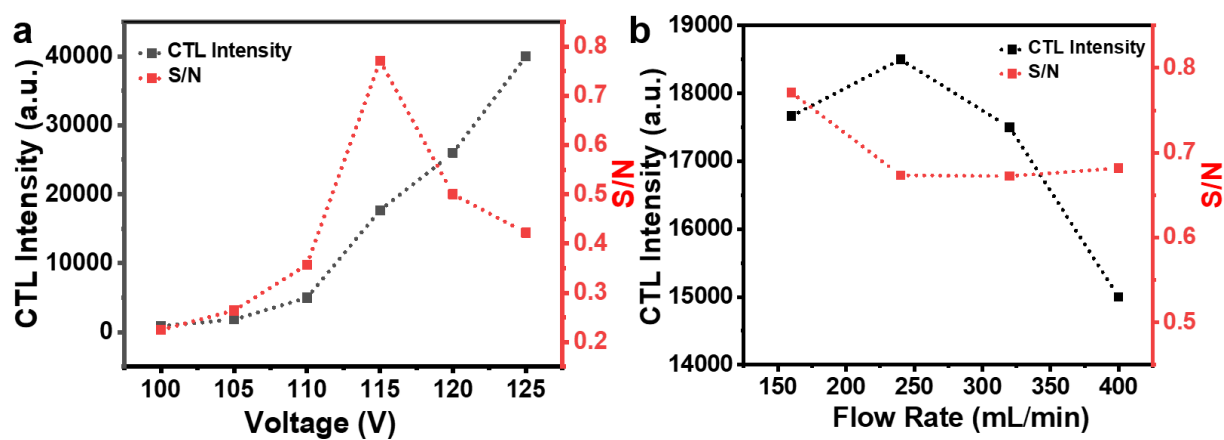

**Figure S3.** Comparisons of the cataluminescence (CTL) intensities and the signal-to-noise (S/N) values of ethanol in the presence of *lp* phase at (a) different temperatures (air flow rate of 240 mL·min<sup>-1</sup> and integration time of 1 s) and (b) different flow rates (working voltage of 115 V and integration time of 1 s).

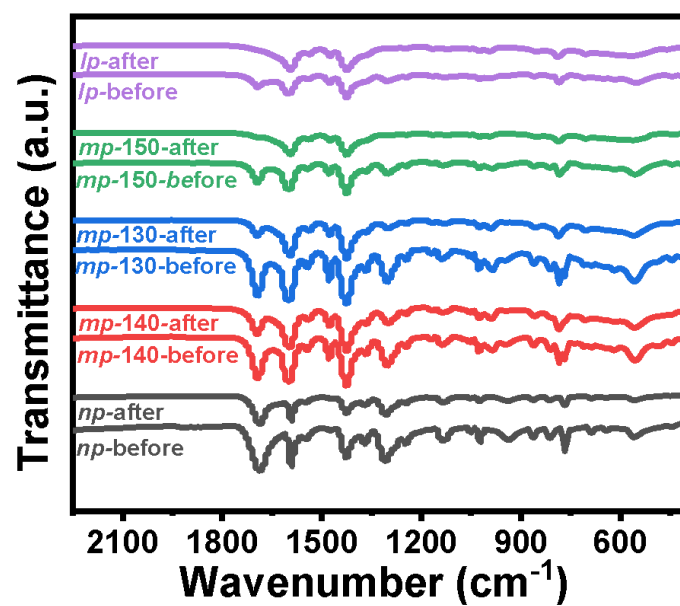

Figure S4. FT-IR spectra for different MOF materials before and after CTL measurements.

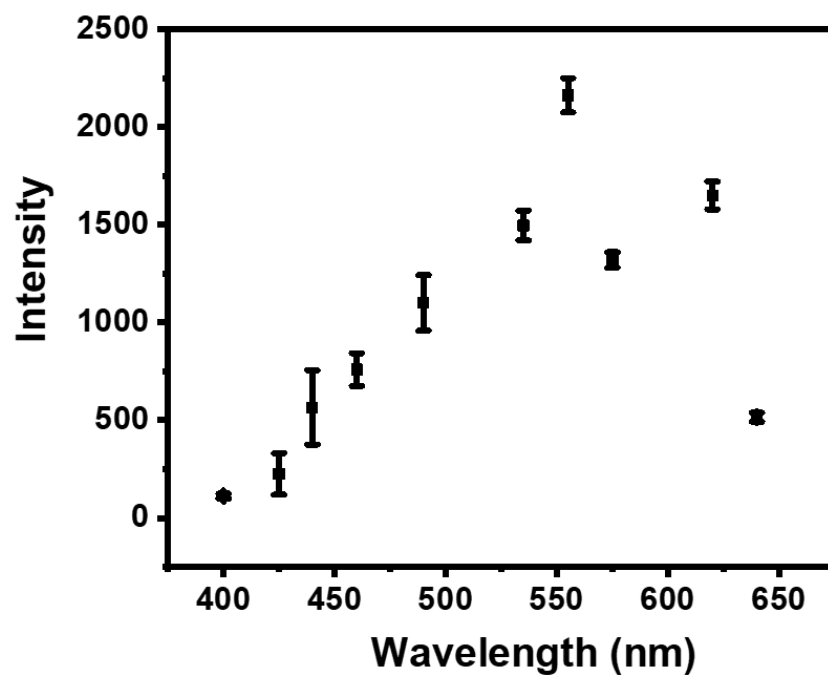

Figure S5. CTL spectrum for the oxidation of ethanol in the presence of *mp*-150 phase.

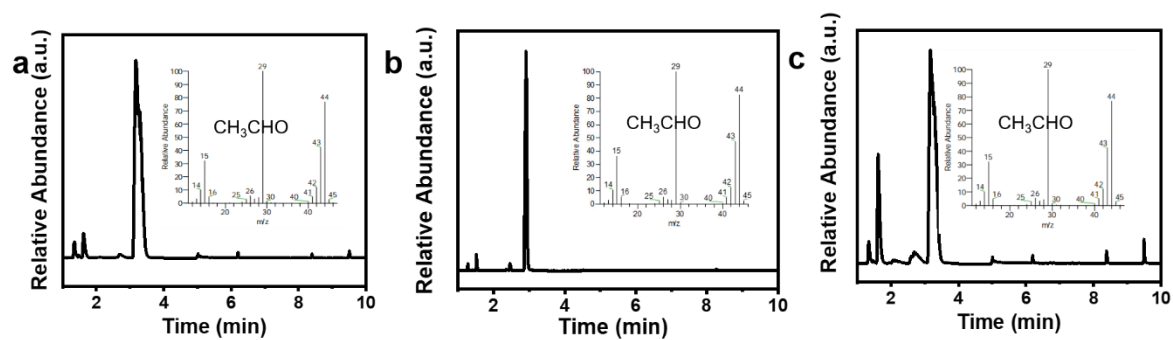

**Figure S6.** Gas chromatography-mass spectrometry (GC-MS) measurements for the reaction of ethanol by the (a) *np*, (b) *mp*-150 and (c) *lp* phases.

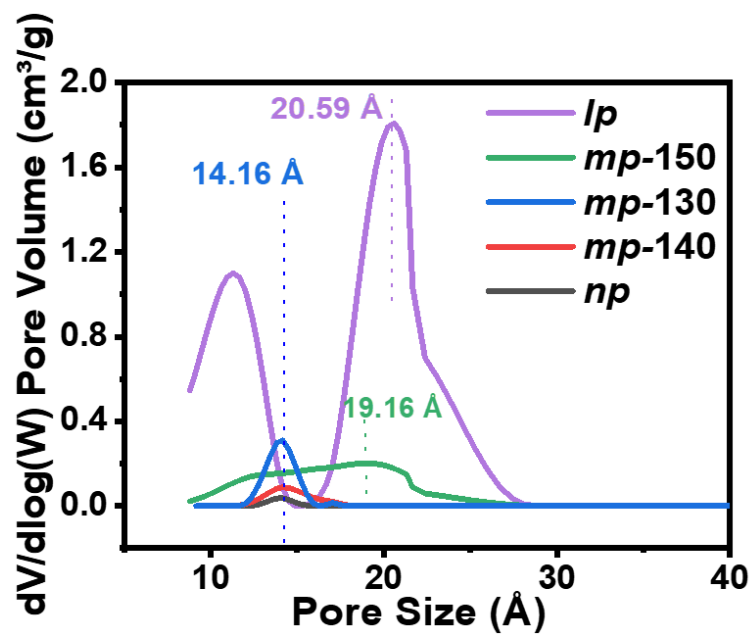

Figure S7. Pore size distribution analysis for different MOF materials.



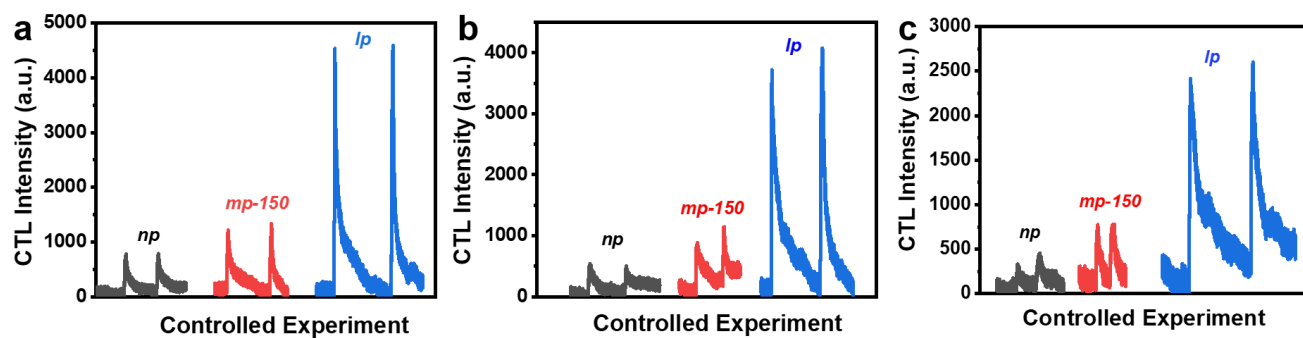

**Figure S8.** CTL intensities for (a) methanol, (b) ethanol and (c) isopropanol in the presence of MOFs with the different phases (the integration time of 0.1 s).

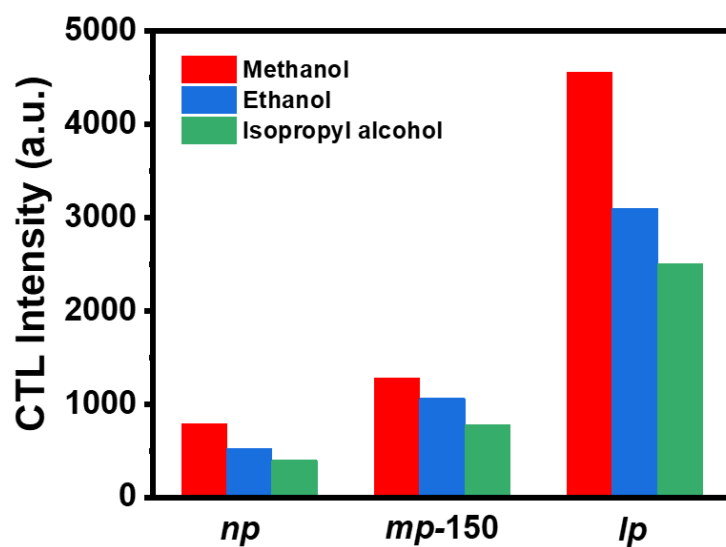

**Figure S9.** CTL intensity variations for methanol, ethanol and isopropanol in the presence of MOFs with the different phases (the integration time of 0.1 s).

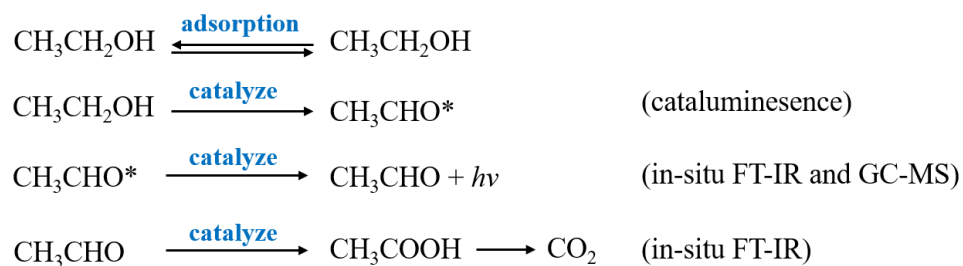

**Scheme S1.** Reaction mechanism and corresponding measurements for the CTL emissions from oxidation of ethanol in the presence of MOFs.

**Table S1.** Peak position analysis for the MOFs with different phases from XRD patterns.

|               | 2 Theta (degree) |
|---------------|------------------|
| <i>np</i>     | 7.2              |
| <i>mp-140</i> | 6.4/7.5          |
| <i>mp-130</i> | 6.4/7.4          |
| <i>mp-150</i> | 6.4/7.5          |
| <i>lp</i>     | 6.3              |

**Table S2.** Weight loss analysis for different MOF materials from TGA measurements.

| Samples        | Peak for the weight loss/°C |
|----------------|-----------------------------|
| <i>lp</i>      | 72                          |
|                | 160                         |
|                | 373                         |
| <i>mp</i> -150 | 373                         |
| <i>mp</i> -130 | 380                         |
| <i>mp</i> -140 | 385                         |
| <i>np</i>      | 386                         |

**Table S3.** CTL intensities and specific surface areas acquired by the Brunauer-Emmett-Teller (BET) measurements for different MOF materials.

| Samples       | BET specific surface area (m <sup>2</sup> /g) | CTL intensity |
|---------------|-----------------------------------------------|---------------|
| <i>lp</i>     | 1024.8792                                     | 67560         |
| <i>mp-150</i> | 212.9573                                      | 52936         |
| <i>mp-130</i> | 69.0713                                       | 29483         |
| <i>mp-140</i> | 50.0968                                       | 25455         |
| <i>np</i>     | 2.6557                                        | 23715         |
